# Supplementary material
Source: PubMed Central journal article supplement (PMC7274525)
Supplement: NIHMS1584700-supplement-Supplementary_Figure_1.pdf [file NIHMS1584700-supplement-Supplementary_Figure_1.pdf]

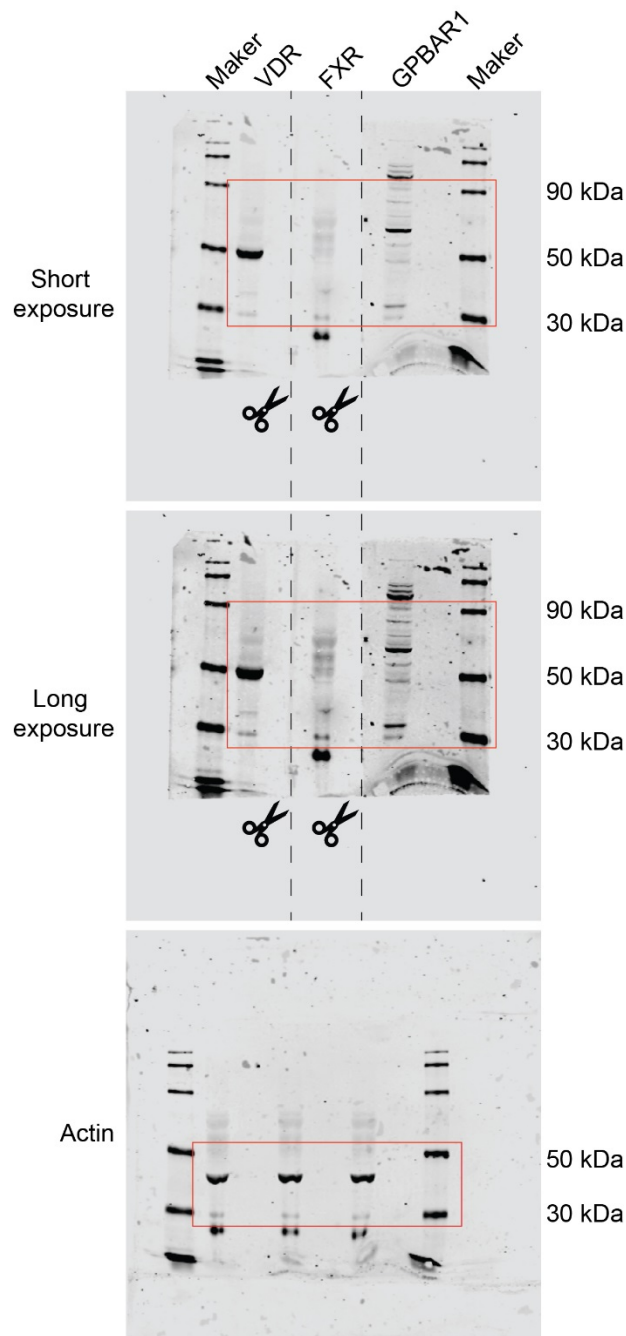

**Supplementary Figure 1. Full scanned western blot image for Extended Data Fig. 6a.**

Western blot of VDR, FXR(NR1H4), and GPBAR1 in the colonic tissue of SPF C57BL/6J mice. The transferred nitrocellulose membrane was cropped to blot with the indicated antibodies, and the signals were detected at the same exposure conditions. The loading controls (Actin) were run on a separate gel.
