# Supplementary material
Source: PubMed Central journal article supplement (PMC7274525)
Supplement: NIHMS1584700-supplement-Supplementary_Table_1.pdf [file NIHMS1584700-supplement-Supplementary_Table_1.pdf]

## Supplementary Tables

### Supplementary Table 1. Nutritional composition of the rich diet and the minimal diet.

Full nutritional information is available on the websites of LabDiet and TestDiet.

| <b>Rich-diet (LabDiet 5K67)</b> |             | <b>Minimal-diet (TestDiet AIN-76A)</b> |             |
|---------------------------------|-------------|----------------------------------------|-------------|
| <b>Protein, %</b>               | <b>19.3</b> | <b>Protein, %</b>                      | <b>18.0</b> |
| Arginine, %                     | 1.10        | Arginine, %                            | 0.70        |
| Histidine, %                    | 0.46        | Histidine, %                           | 0.52        |
| Isoleucine, %                   | 0.78        | Isoleucine, %                          | 0.96        |
| Leucine, %                      | 1.52        | Leucine, %                             | 1.73        |
| Lysine, %                       | 0.98        | Lysine, %                              | 1.45        |
| Methionine, %                   | 0.62        | Methionine, %                          | 0.82        |
| Cystine, %                      | 0.36        | Cystine, %                             | 0.07        |
| Phenylalanine, %                | 0.87        | Phenylalanine, %                       | 0.96        |
| Tyrosine, %                     | 0.58        | Tyrosine, %                            | 1.01        |
| Threonine, %                    | 0.70        | Threonine, %                           | 0.77        |
| Tryptophan, %                   | 0.23        | Tryptophan, %                          | 0.22        |
| Valine, %                       | 0.91        | Valine, %                              | 1.14        |
| Alanine, %                      | 1.17        | Alanine, %                             | 0.55        |
| Aspartic Acid, %                | 1.90        | Aspartic Acid, %                       | 1.29        |
| Glutamic Acid, %                | 4.41        | Glutamic Acid, %                       | 4.08        |
| Glycine, %                      | 0.96        | Glycine, %                             | 0.39        |
| Proline, %                      | 1.43        | Proline, %                             | 2.36        |
| Serine, %                       | 0.96        | Serine, %                              | 1.10        |
| Taurine, %                      | 0.05        | Taurine, %                             | 0.00        |
| <b>Fat, %</b>                   | <b>7.3</b>  | <b>Fat, %</b>                          | <b>5.0</b>  |
| Cholesterol, ppm                | 243         | Cholesterol, ppm                       | 0.00        |
| Linoleic Acid, %                | 2.65        | Linoleic Acid, %                       | 2.86        |
| Linolenic Acid, %               | 0.38        | Linolenic Acid, %                      | 0.05        |
| Arachidonic Acid, %             | 0.02        | Arachidonic Acid, %                    | 0.00        |
| Omega-3 Fatty Acids, %          | 0.60        | Omega-3 Fatty Acids, %                 | 0.05        |
| Saturated Fatty Acids, %        | 1.14        | Saturated Fatty Acids, %               | 0.64        |
| Monounsaturated Fatty Acids, %  | 1.32        | Monounsaturated Fatty Acids, %         | 1.21        |
| Polyunsaturated Fatty Acids, %  | N/A         | Polyunsaturated Fatty Acids, %         | 2.90        |
| <b>Fiber (Crude), %</b>         | <b>4.4</b>  | <b>Fiber (Powdered Cellulose), %</b>   | <b>5.0</b>  |
| <b>Carbohydrates, %</b>         | <b>53.5</b> | <b>Carbohydrates, %</b>                | <b>66.4</b> |
| <b>Minerals</b>                 |             | <b>Minerals</b>                        |             |
| Calcium, %                      | 1.33        | Calcium, %                             | 0.53        |
| Phosphorus, %                   | 0.96        | Phosphorus, %                          | 0.56        |
| Potassium, %                    | 0.69        | Potassium, %                           | 0.36        |
| Magnesium, %                    | 0.23        | Magnesium, %                           | 0.05        |
| Sodium, %                       | 0.29        | Sodium, %                              | 0.12        |

|                            |             |                            |             |
|----------------------------|-------------|----------------------------|-------------|
| Chloride, %                | 0.46        | Chloride, %                | 0.21        |
| Fluorine, ppm              | 35          | Fluorine, ppm              | 0.00        |
| Iron, ppm                  | 380         | Iron, ppm                  | 38          |
| Zinc, ppm                  | 87          | Zinc, ppm                  | 36          |
| Manganese, ppm             | 160         | Manganese, ppm             | 59          |
| Copper, ppm                | 11          | Copper, ppm                | 6.0         |
| Cobalt, ppm                | 0.82        | Cobalt, ppm                | 0.00        |
| Iodine, ppm                | 2.1         | Iodine, ppm                | 0.21        |
| Chromium, ppm              | 0.01        | Chromium, ppm              | 2.0         |
| Molybdenum, ppm            | 0.00        | Molybdenum, ppm            | 0.00        |
| Selenium, ppm              | 0.39        | Selenium, ppm              | 0.17        |
| <b>Vitamins</b>            |             | <b>Vitamins</b>            |             |
| Carotene, ppm              | 1.5         | Carotene, ppm              | 0.0         |
| Vitamin A, IU/g            | 20          | Vitamin A, IU/g            | 4.0         |
| Vitamin D-3 (added), IU/g  | 4.4         | Vitamin D-3 (added), IU/g  | 1.0         |
| Vitamin E, IU/kg           | 45          | Vitamin E, IU/kg           | 50.0        |
| Vitamin K, ppm             | 20          | Vitamin K, ppm             | 0.5         |
| Thiamin Hydrochloride, ppm | 79          | Thiamin Hydrochloride, ppm | 6.1         |
| Riboflavin, ppm            | 9.0         | Riboflavin, ppm            | 6.7         |
| Niacin, ppm                | 87          | Niacin, ppm                | 30          |
| Pantothenic Acid, ppm      | 37          | Pantothenic Acid, ppm      | 16          |
| Folic Acid, ppm            | 1.9         | Folic Acid, ppm            | 2.1         |
| Pyridoxine, ppm            | 10          | Pyridoxine, ppm            | 5.8         |
| Biotin, ppm                | 0.3         | Biotin, ppm                | 0.2         |
| Vitamin B-12, mcg/kg       | 51          | Vitamin B-12, mcg/kg       | 14          |
| Choline Chloride, ppm      | 2000        | Choline Chloride, ppm      | 1000        |
| Ascorbic Acid, ppm         | 0.00        | Ascorbic Acid, ppm         | 0.00        |
| <b>Energy (kcal/g)</b>     | <b>4.15</b> | <b>Energy (kcal/g)</b>     | <b>3.83</b> |
| <b>Protein, %</b>          | <b>22.4</b> | <b>Protein, %</b>          | <b>18.8</b> |
| <b>Fat, %</b>              | <b>15.6</b> | <b>Fat, %</b>              | <b>11.8</b> |
| <b>Carbohydrates, %</b>    | <b>62.0</b> | <b>Carbohydrates, %</b>    | <b>69.4</b> |
