# Supplementary material
Source: PubMed Central journal article supplement (PMC7274525)
Supplement: NIHMS1584700-supplement-Supplementary_Table_2.pdf [file NIHMS1584700-supplement-Supplementary_Table_2.pdf]

**Supplementary Table 2. A complete list of BA and SCFA analytes along with their chemical structure, LC retention time, and exact mass.**

| Name                        | Chemical structure                                                                  | Retention time (min) | Monoisotopic mass | Ion                   |
|-----------------------------|-------------------------------------------------------------------------------------|----------------------|-------------------|-----------------------|
| Tauro-cholic acid           | 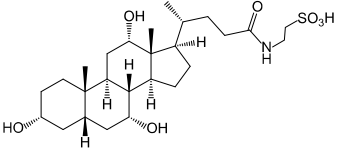   | 5.49                 | 514.28            | [M-H] <sup>-</sup>    |
| Tauro-chenodeoxycholic acid |    | 6.37                 | 498.29            | [M-H] <sup>-</sup>    |
| Tauro-ursodeoxycholic acid  |    | 5.48                 | 498.29            | [M-H] <sup>-</sup>    |
| Tauro-α-muricholic acid     |   | 4.44                 | 514.28            | [M-H] <sup>-</sup>    |
| Tauro-β-muricholic acid     |  | 4.61                 | 514.28            | [M-H] <sup>-</sup>    |
| Cholic acid                 |  | 7.13                 | 453.29            | [M+HCOO] <sup>-</sup> |
| Chenodeoxycholic acid       |  | 8.03                 | 437.29            | [M+HCOO] <sup>-</sup> |
| Ursodeoxycholic acid        |  | 7.44                 | 437.29            | [M+HCOO] <sup>-</sup> |
| α-Muricholic acid           |  | 6.54                 | 453.29            | [M+HCOO] <sup>-</sup> |

|                             |                                                                                     |      |        |                       |
|-----------------------------|-------------------------------------------------------------------------------------|------|--------|-----------------------|
| $\beta$ -Muricholic acid    | 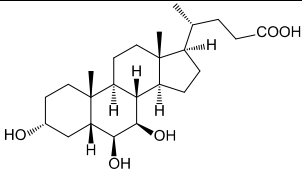   | 6.83 | 453.29 | [M+HCOO] <sup>-</sup> |
| Deoxycholic acid            |    | 8.09 | 437.29 | [M+HCOO] <sup>-</sup> |
| Lithocholic acid            |    | 8.92 | 421.28 | [M+HCOO] <sup>-</sup> |
| 3-oxo-cholic acid           |    | 7.08 | 451.27 | [M+HCOO] <sup>-</sup> |
| 3-oxo-lithocholic acid      |   | 8.97 | 419.27 | [M+HCOO] <sup>-</sup> |
| 7-oxo-cholic acid           |  | 6.55 | 451.27 | [M+HCOO] <sup>-</sup> |
| 7-oxo-chenodeoxycholic acid |  | 7.73 | 435.27 | [M+HCOO] <sup>-</sup> |
| 12-oxo-cholic acid          |  | 6.90 | 451.27 | [M+HCOO] <sup>-</sup> |
| 12-oxo-deoxycholic acid     |  | 7.79 | 435.27 | [M+HCOO] <sup>-</sup> |
| $\omega$ -Muricholic acid   |  | 6.42 | 453.29 | [M+HCOO] <sup>-</sup> |

|            |                                                                                   |     |       |        |
|------------|-----------------------------------------------------------------------------------|-----|-------|--------|
| Acetate    |  | 1.6 | 59.01 | [M-H]- |
| Propionate |  | 1.1 | 73.03 | [M-H]- |
| Butyrate   |  | 0.9 | 87.04 | [M-H]- |
